# Supplementary material
Source: PubMed Central journal article supplement (PMC7216446)
Supplement: ONCO-25-e870-s002.pdf [file ONCO-25-e870-s002.pdf]

Supplemental Table for:

The Impact of Anlotinib on Brain Metastases of NSCLC: Post-hoc Analysis of a Phase III Randomized Control Trial (ALTER0303)

Hengrui Liang et al.

**Supplementary Table S1. The brain-associated toxicities**

|                                           | <b>Anlotinb n=294</b> |               |              | <b>Placebo n=143</b> |               |              |
|-------------------------------------------|-----------------------|---------------|--------------|----------------------|---------------|--------------|
|                                           | <b>BM</b>             | <b>Non-BM</b> | <b>Total</b> | <b>BM</b>            | <b>Non-BM</b> | <b>Total</b> |
| <b>Mental disorder</b>                    | 8                     | 37            | 45           | 3                    | 17            | 20           |
| <b>Upset</b>                              | 0                     | 1             | 1            | 0                    | 0             | 0            |
| <b>Anxiety</b>                            | 5                     | 27            | 32           | 0                    | 12            | 12           |
| <b>Insomnia</b>                           | 7                     | 24            | 31           | 1                    | 14            | 15           |
| <b>Drowsiness</b>                         | 1                     | 5             | 6            | 2                    | 3             | 5            |
| <b>Depressed</b>                          | 0                     | 1             | 1            | 0                    | 0             | 0            |
| <b>Suicidal tendency</b>                  | 0                     | 0             | 0            | 0                    | 1             | 1            |
| <b>Delusion</b>                           | 0                     | 1             | 1            | 0                    | 0             | 0            |
| <b>Nervous system diseases</b>            | 21                    | 65            | 86           | 6                    | 14            | 20           |
| <b>Headache</b>                           | 6                     | 28            | 34           | 1                    | 4             | 5            |
| <b>Dizzy</b>                              | 9                     | 25            | 34           | 4                    | 9             | 13           |
| <b>Unconscious</b>                        | 5                     | 2             | 7            | 0                    | 0             | 0            |
| <b>Aphasia</b>                            | 0                     | 1             | 1            | 0                    | 0             | 0            |
| <b>Facial paralysis</b>                   | 1                     | 0             | 1            | 0                    | 0             | 0            |
| <b>Cerebral hemorrhage</b>                | 1                     | 0             | 1            | 1                    | 0             | 1            |
| <b>Cerebral thromboembolic</b>            | 1                     | 2             | 3            | 0                    | 0             | 0            |
| <b>Metastatic tumor hemorrhage</b>        | 1                     | 0             | 1            | 0                    | 0             | 0            |
| <b>Cerebral edema</b>                     | 0                     | 0             | 0            | 1                    | 1             | 2            |
| <b>Epileptic seizure</b>                  | 2                     | 1             | 3            | 1                    | 0             | 1            |
| <b>Pulmonary encephalopathy</b>           | 0                     | 1             | 1            | 0                    | 0             | 0            |
| <b>Paresthesia</b>                        | 2                     | 12            | 14           | 1                    | 4             | 5            |
| <b>Dysgeusia</b>                          | 0                     | 1             | 1            | 0                    | 0             | 0            |
| <b>Peripheral nervous disturbance</b>     | 0                     | 1             | 1            | 1                    | 0             | 1            |
| <b>Hypomnesia</b>                         | 0                     | 7             | 7            | 0                    | 0             | 0            |
| <b>Epileptic seizure (Grade 3)</b>        | 0                     | 1             | 1            | 0                    | 0             | 0            |
| <b>Suicidal tendency (Grade 3)</b>        | 0                     | 0             | 0            | 0                    | 1             | 1            |
| <b>Cerebral hemorrhage (Grade 3)</b>      | 1                     | 0             | 1            | 0                    | 0             | 0            |
| <b>Unconscious (Grade 4)</b>              | 4                     | 0             | 4            | 0                    | 0             | 0            |
| <b>Pulmonary encephalopathy (Grade 4)</b> | 0                     | 1             | 1            | 0                    | 0             | 0            |
| <b>Cerebral edema (Grade 4)</b>           | 0                     | 0             | 0            | 1                    | 0             | 1            |
| <b>Cerebral hemorrhage (Grade 5)</b>      | 0                     | 0             | 0            | 1                    | 0             | 1            |

BM, brain metastasis
